# Supplementary material for: Adult conspecific density affects Janzen-Connell patterns by modulating the recruitment exclusion zones
Source: Frontiers journal article supplement (doi:10.3389/fpls.2023.1079975), 2023-06-27
Supplement: Image_1.PDF [file Image_1.PDF]

---

**Algorithm\_1: Seeds and Seedlings maps**

---

```
% Input Algorithm_1 setup
Define Number of species (1 or 2)
Define Number of trees
Define NF level
Define number of iterations
% Initialization stage
    Target Tree in the center
For each iterations
    For each tree
        Random Tree positions
    Endfor
    % NF map
    Calculate NF matrix
    % seed and seedling map
    For each tree
        Produce 1000 Seeds
        Seed dispersal
        Seed establishment (Seedling)
    Endfor
Endfor
```

---

**Algorithm\_2: Seeds and Seedlings distribution and classification**

---

```
% Input Algorithm_2 setup
Define tori
Define tori areas
Define 4 groups: Janzen-Connel; Uniform; Hubbel; Saturation
% Calculate Seeds and Seedlings distributions
For each of 1000 iterations
    For each tori
        Count number of seeds
        Count number of seedlings
    Endfor
Normalization seeds and seedlings distribution
Classification each distribution into 4 groups
Endfor
```

---
