# Supplementary material for: Adult conspecific density affects Janzen-Connell patterns by modulating the recruitment exclusion zones
Source: Frontiers journal article supplement (doi:10.3389/fpls.2023.1079975), 2023-06-27

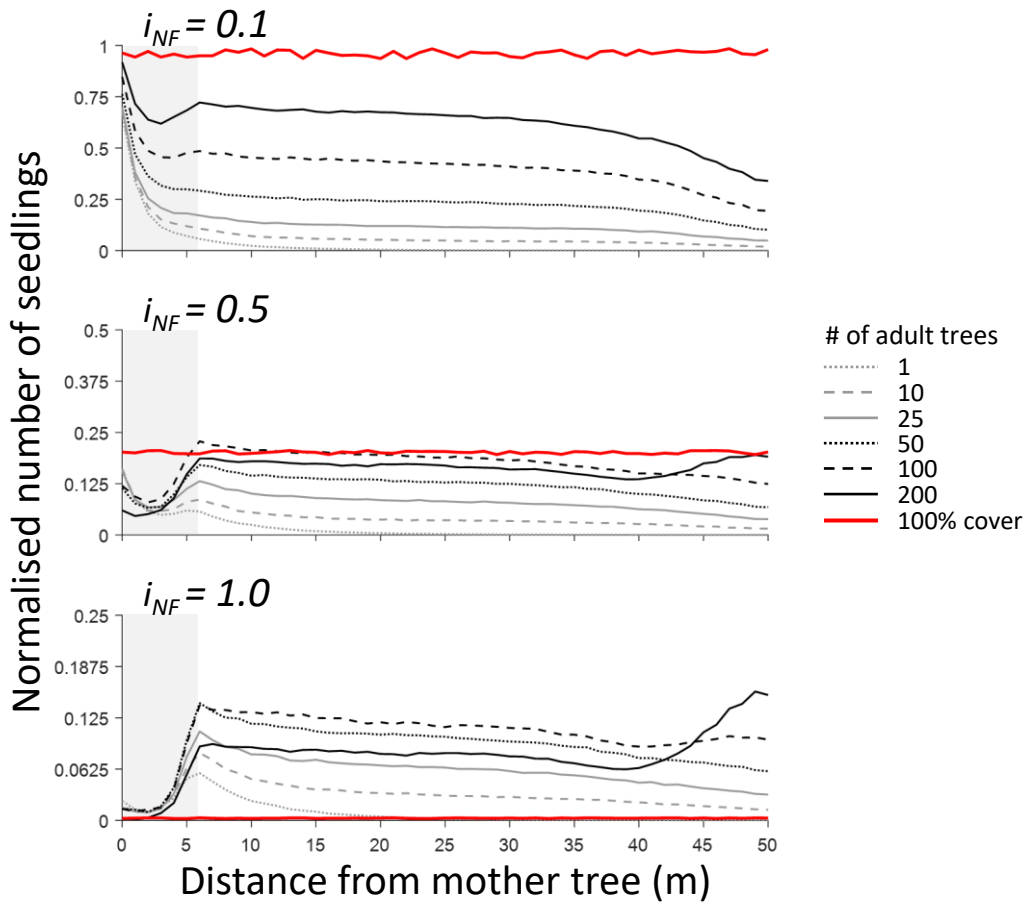

Supplement: Image_2.PDF [file Image_2.PDF]
