# Supplementary material for: Adult conspecific density affects Janzen-Connell patterns by modulating the recruitment exclusion zones
Source: Frontiers journal article supplement (doi:10.3389/fpls.2023.1079975), 2023-06-27
Supplement: Image_3.PDF [file Image_3.PDF]

$$i_{NF}$$

0.1

0.5

1.0

Total # of adult trees = 25

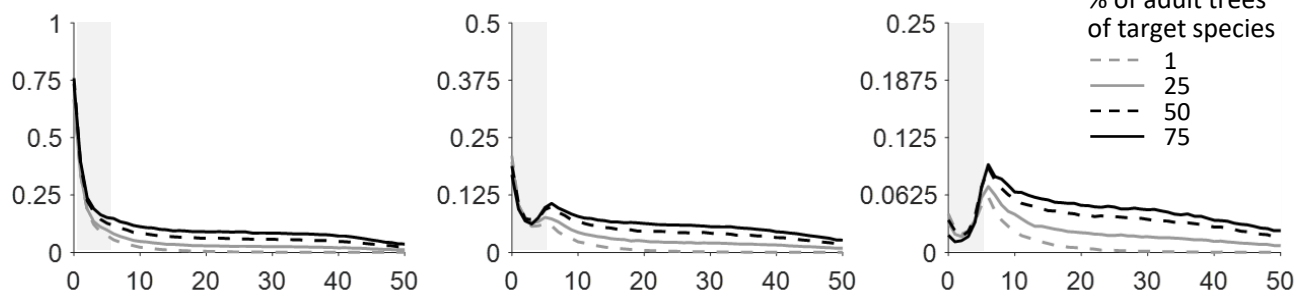

Total # of adult trees = 50

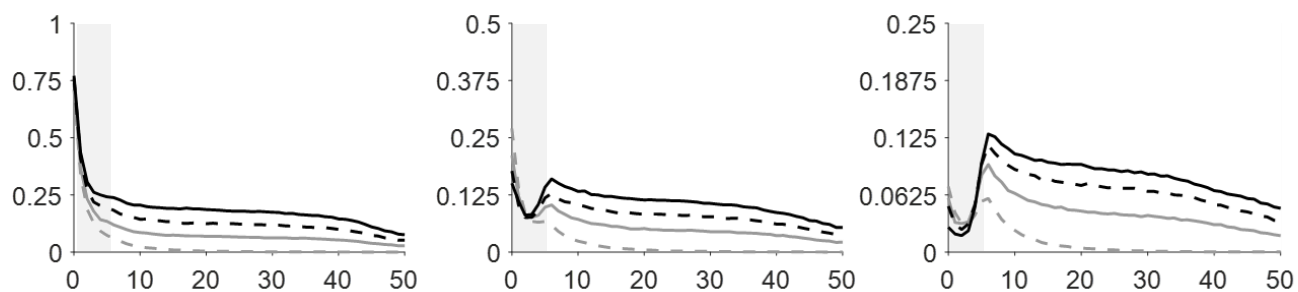

Total # of adult trees = 100

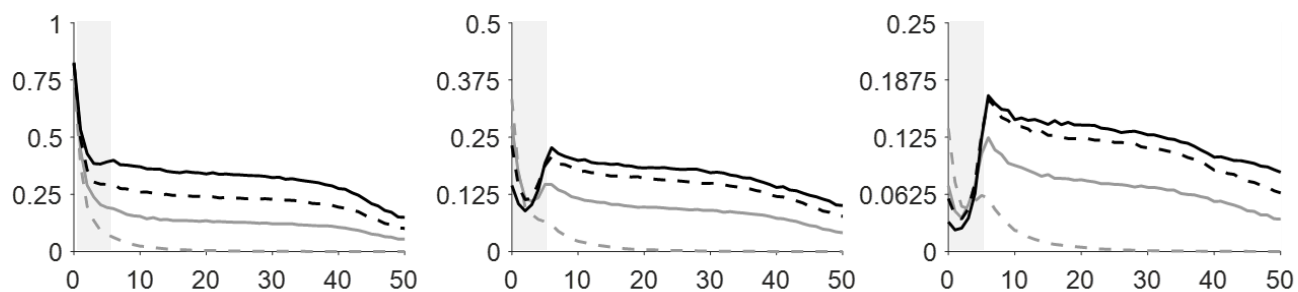

Total # of adult trees = 200

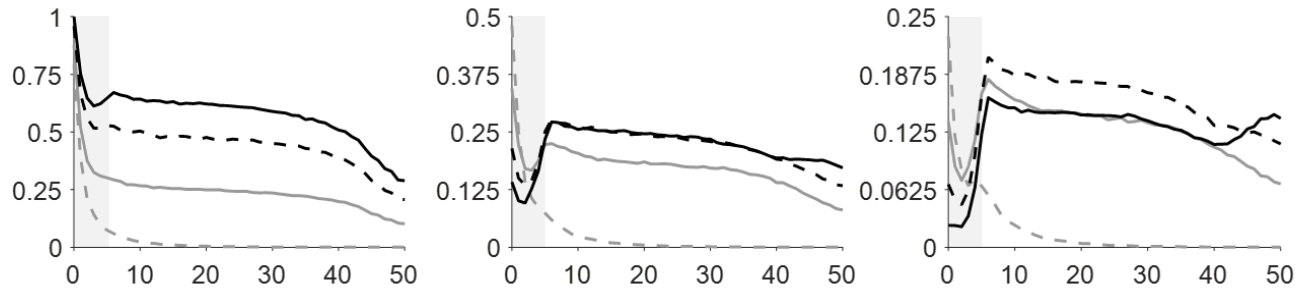

Distance from mother tree (m)
